# Supplementary material for: Converting mesoporous polydopamine coated MIL-125 (Ti) to a core–shell heterostructure for efficient water desalination
Source: Royal Society of Chemistry journal article supplement (doi:10.1039/d1en00654a), 2021-01-01
Supplement: d1en00654a1.pdf [file d1en00654a1.pdf]

## Supporting Information

### **Converting mesoporous polydopamine coated MIL-125 (Ti) to core-shell heterostructure for efficient water desalination**

Hao Zhang, Chaohai Wang, Xiaodie Li, Jia Xie, Xin Yan, Junwen Qi, Xiuyun Sun, and Jiansheng Li\*

Key Laboratory of Jiangsu Province for Chemical Pollution Control and Resources Reuse, School of Environmental and Biological Engineering, Nanjing University of Science and Technology, Nanjing 210094, China.

E-mail: [lijsh@njust.edu.cn](mailto:lijsh@njust.edu.cn)

**Chemicals.** Tetra-n-butyl titanate  $\text{Ti}(\text{OC}_4\text{H}_9)_4$  was purchased from Sinopharm Chemical Reagent Co., Ltd. Terephthalic acid ( $\text{H}_2\text{BDC}$ ), dopamine hydrochloride, and 1, 3, 5-trimethylbenzene (TMB) were purchased from Aladdin Industrial Corporation. Pluronic F127 and were purchased from Sigma-Aldrich. Carbon black was purchased from Alfa Aesar. Tris-buffer was purchased from Bio-Rad Laboratories, Inc. Polytetrafluoroethylene (PTFE), anhydrous ethanol, methanol, sodium chloride (NaCl), and N, N-dimethylformamide (DMF) were obtained from Nanjing Chemical Reagent Co., Ltd. All chemicals were used as received without further purification.

**Materials Characterization.** The morphology and structure of the samples were conducted by scanning electron microscopy (SEM, JEOL 7800 system) and transmission electron microscopy (TEM, FEI Tecnai G2 F30 S-Twin). The composition was investigated by X-ray diffraction (XRD, BRUKER D8,  $\text{Cu K}\alpha$ ) at 40 kV and 40 mA ( $\lambda = 1.5418 \text{ \AA}$ ). The  $\text{N}_2$  adsorption-desorption isotherms were collected using the Micromeritics ASAP-2020 instrument. X-ray photoelectron spectroscopy (XPS) spectra were obtained by PHI Quantera II ESCA System with Al  $\text{K}\alpha$  radiation at 1486.8 V. Thermogravimetric analysis (TGA) measurements were conducted by the SDT Q600 thermogravimetry/differential thermal analyzer. Raman spectroscopy was conducted using the Renishaw in Via reflex spectrometer system. Fourier transform infrared (FTIR) spectra of the samples were obtained using FT-IR spectrometer (Bruker HYPERION, Germany).

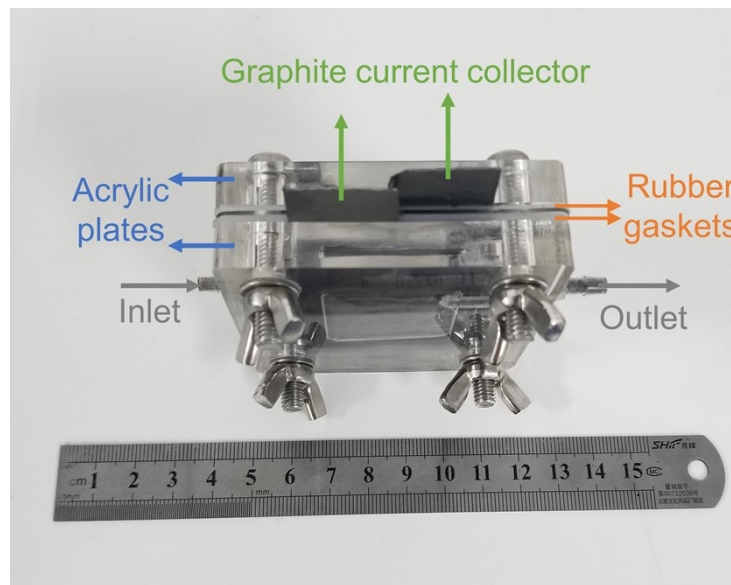

Fig. S1. The digital photograph of HCDI device.

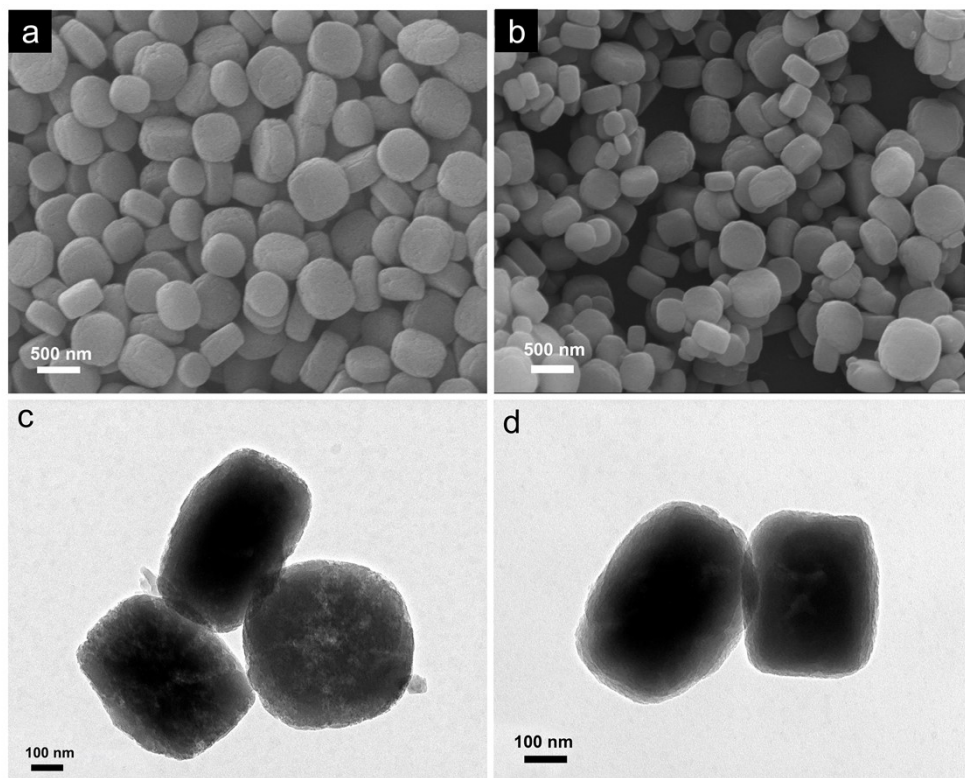

Fig. S2. (a) SEM image and (c) TEM image of MIL-125. (b) SEM image and (d) TEM image of MIL-125@PDA.

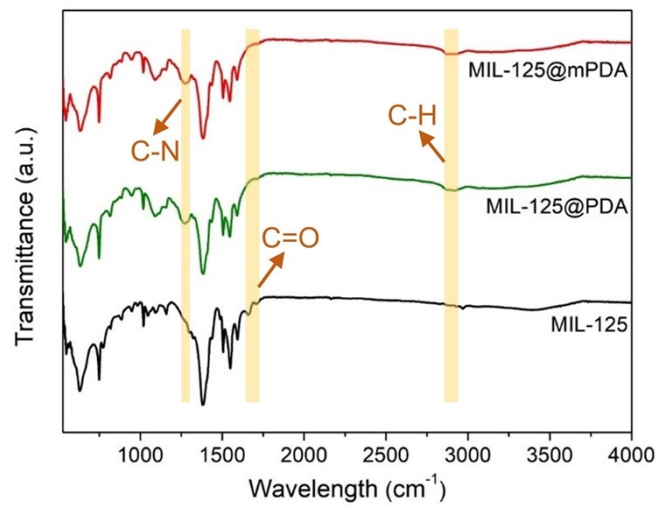

Fig. S3. Fourier transform infrared (FTIR) spectra of MIL-125, MIL-125@PDA, and MIL-125@mPDA.

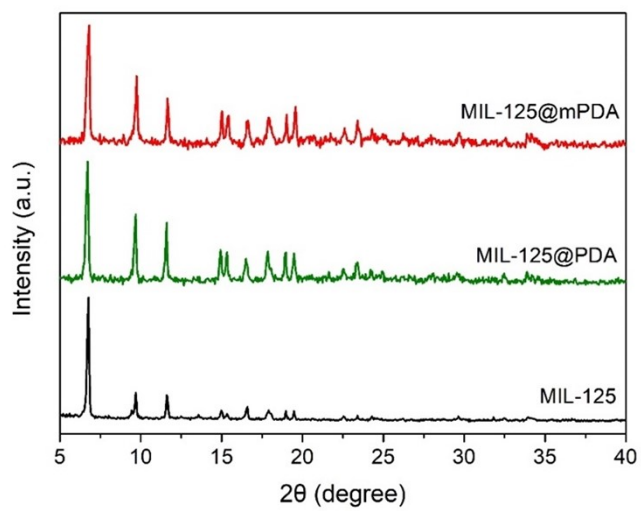

Fig. S4. X-ray diffraction (XRD) patterns of MIL-125, MIL-125@PDA, and MIL-125@mPDA.

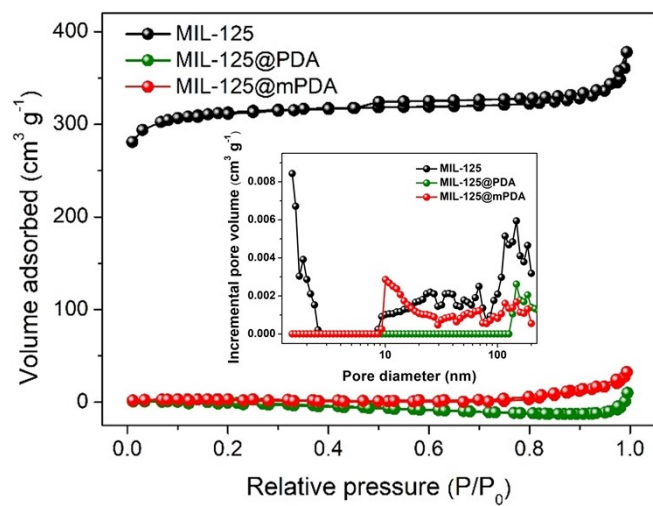

Fig. S5. N<sub>2</sub> adsorption/desorption isotherms and pore size distributions (insert) of MIL-125, MIL-125@PDA, and MIL-125@mPDA.

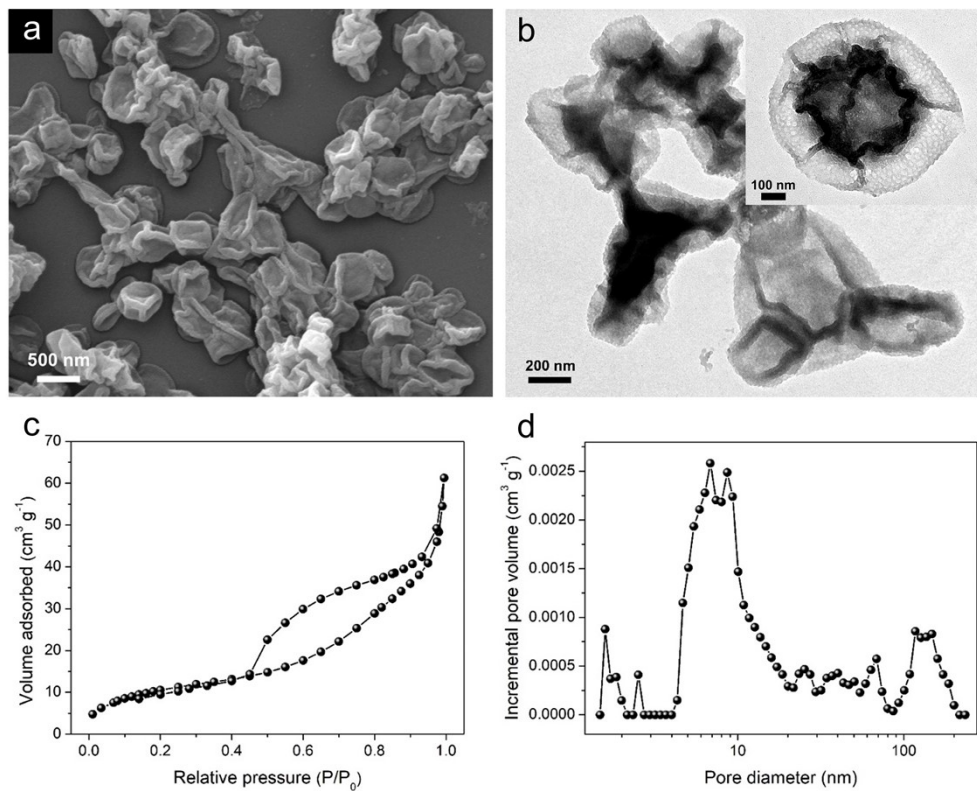

Fig. S6. (a) SEM image, (b) TEM image, (c) N<sub>2</sub> adsorption/desorption isotherm, and (d) pore size distribution of the mesostructured PDA shell after the alkali etching of MIL-125 core.



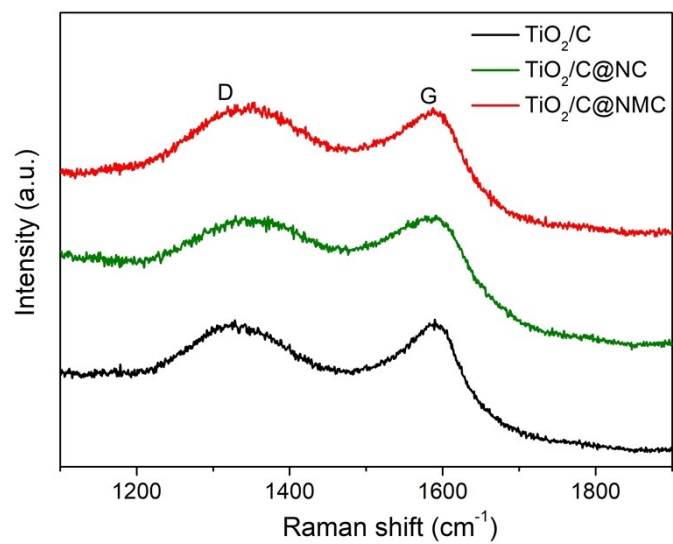

Fig. S7. Raman spectra ranging from 1100 cm<sup>-1</sup> and 1900 cm<sup>-1</sup> of TiO<sub>2</sub>/C, TiO<sub>2</sub>/C@NC, and TiO<sub>2</sub>/C@NMC.

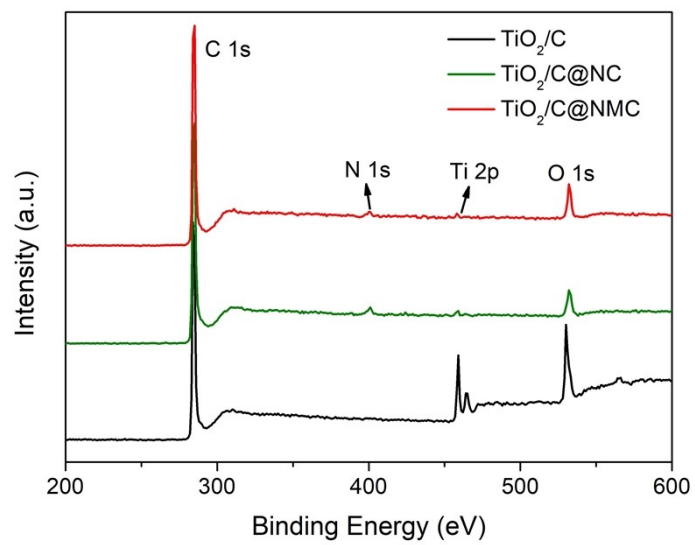

Fig. S8. XPS full surveys of  $\text{TiO}_2/\text{C}$ ,  $\text{TiO}_2/\text{C@NC}$ , and  $\text{TiO}_2/\text{C@NMC}$ .

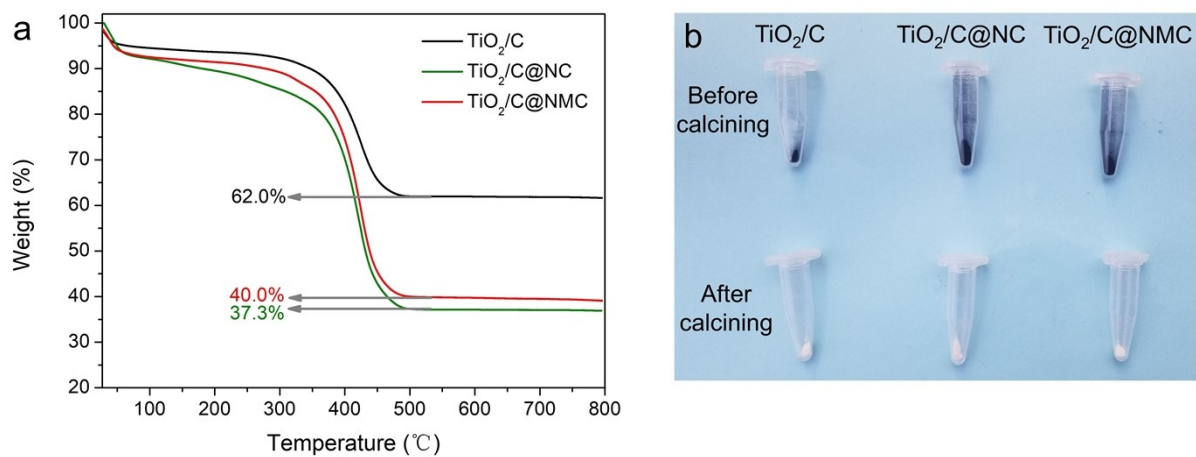

Fig. S9. (a) TGA curves of TiO<sub>2</sub>/C, TiO<sub>2</sub>/C@NC, and TiO<sub>2</sub>/C@NMC tested in air atmosphere with a heating rate of 10 °C min<sup>-1</sup> and (b) the digital photograph of TiO<sub>2</sub>/C, TiO<sub>2</sub>/C@NC, and TiO<sub>2</sub>/C@NMC before and after calcining.

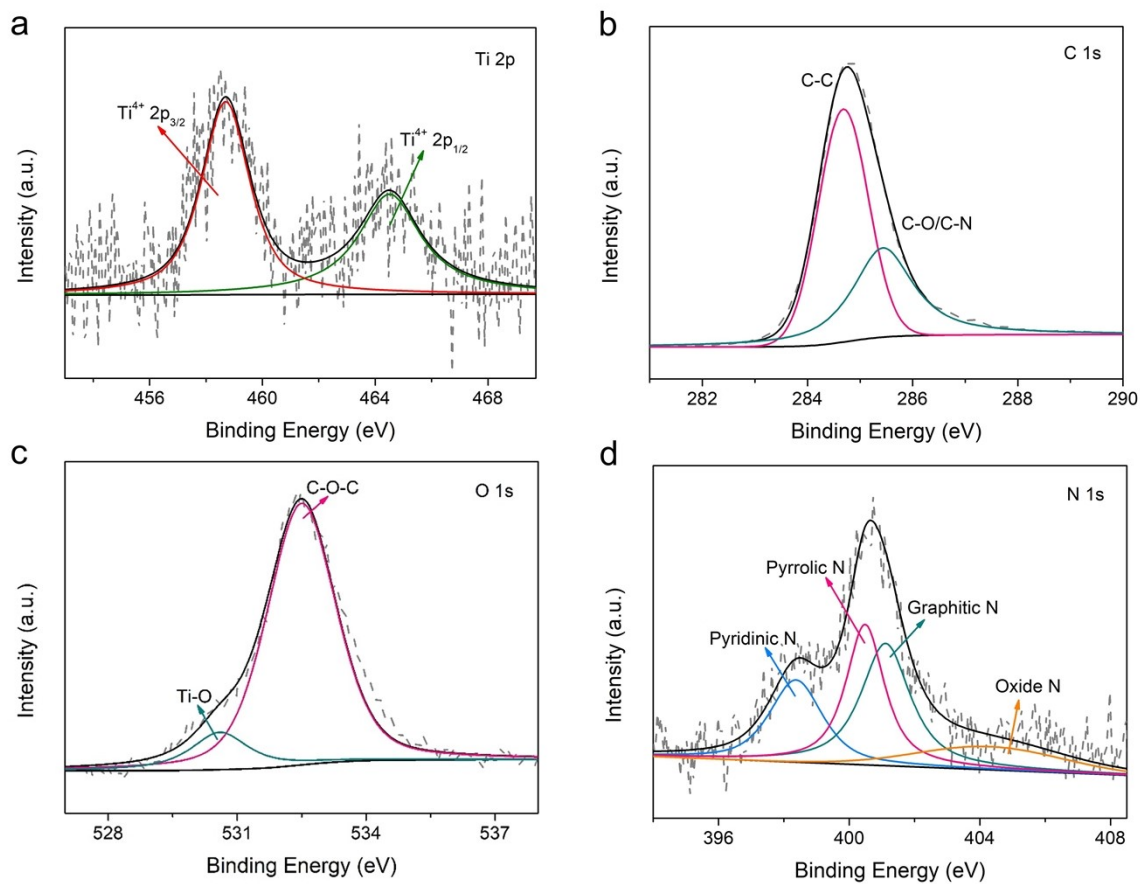

Fig. S10. (a) Ti 2p spectra, (b) C 1s spectra, (c) O 1s, and (d) N 1s of  $\text{TiO}_2/\text{C}@/\text{NMC}$ .

Table S1. Structural parameters and elemental compositions of TiO<sub>2</sub>/C, TiO<sub>2</sub>/C@NC, and TiO<sub>2</sub>/C@NMC.

| Sample                  | $S_{\text{BET}}$<br>(m <sup>2</sup> g <sup>-1</sup> ) | $V_{\text{pore}}$<br>(cm <sup>3</sup> g <sup>-1</sup> ) | Surface elemental<br>composition (%) |      |     |     | Ti content calculated<br>by TGA (%) |
|-------------------------|-------------------------------------------------------|---------------------------------------------------------|--------------------------------------|------|-----|-----|-------------------------------------|
|                         |                                                       |                                                         | C                                    | O    | Ti  | N   |                                     |
| TiO <sub>2</sub> /C     | 330.6                                                 | 0.22                                                    | 79.9                                 | 14.6 | 5.5 | /   | 37.1                                |
| TiO <sub>2</sub> /C@NC  | 189.7                                                 | 0.09                                                    | 89.4                                 | 6.3  | 0.8 | 3.5 | 22.3                                |
| TiO <sub>2</sub> /C@NMC | 202.3                                                 | 0.12                                                    | 89.7                                 | 7.3  | 0.7 | 2.3 | 24.0                                |

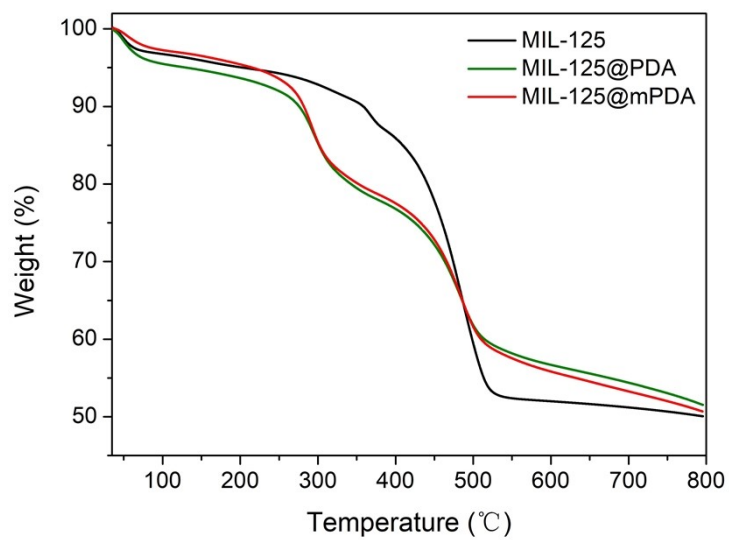

Fig. S11. TGA curves of MIL-125, MIL-125@PDA, and MIL-125@mPDA tested in N<sub>2</sub> atmosphere with a heating rate of 5 °C min<sup>-1</sup>.

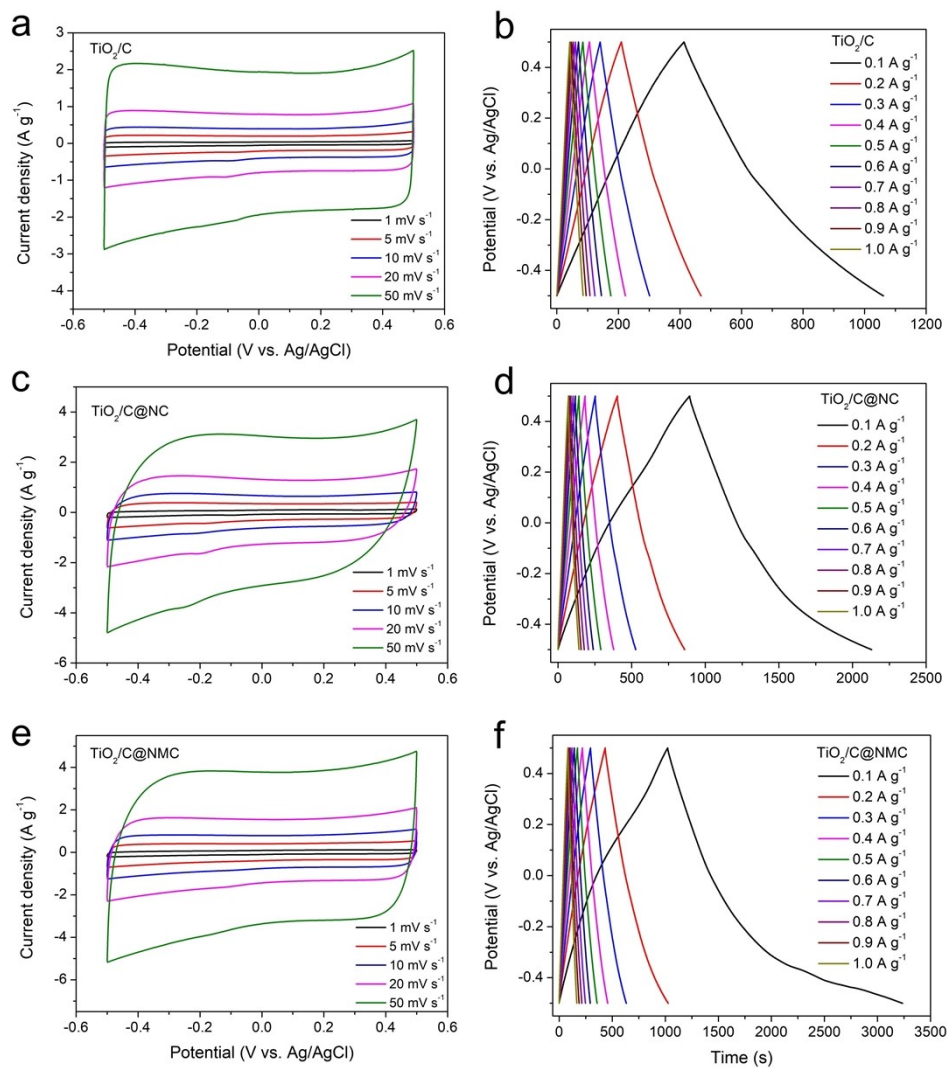

Fig. S12. CV curves and GCD plots of (a, b)  $\text{TiO}_2/\text{C}$ , (c, d)  $\text{TiO}_2/\text{C}@\text{NC}$ , and (e, f)  $\text{TiO}_2/\text{C}@\text{NMC}$  at different scan rates and current densities in 1 M NaCl solution.

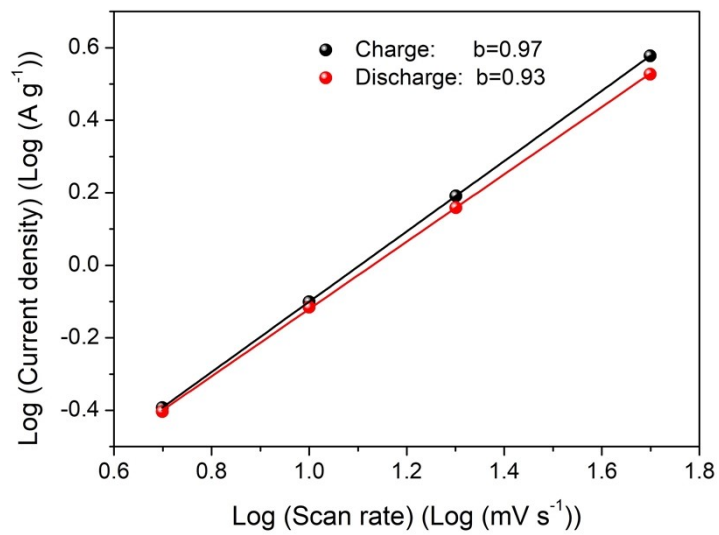

Fig. S13. The  $b$  values determined by using the relationship between the current density and the scan rate.



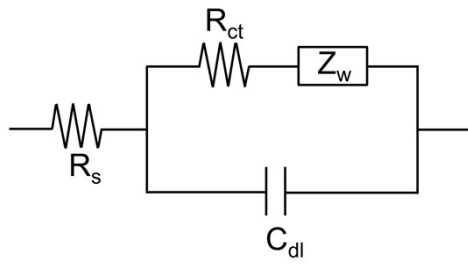

Fig. S14. The equivalent circuit diagram of EIS.

Table S2.  $R_s$  and  $R_{ct}$  of  $\text{TiO}_2/\text{C}$ ,  $\text{TiO}_2/\text{C}@\text{NC}$ , and  $\text{TiO}_2/\text{C}@\text{NMC}$  electrodes.

| Sample                             | $R_s$ ( $\Omega$ ) | $R_{ct}$ ( $\Omega$ ) |
|------------------------------------|--------------------|-----------------------|
| $\text{TiO}_2/\text{C}$            | 2.81               | 3.56                  |
| $\text{TiO}_2/\text{C}@\text{NC}$  | 2.84               | 3.33                  |
| $\text{TiO}_2/\text{C}@\text{NMC}$ | 2.71               | 2.72                  |

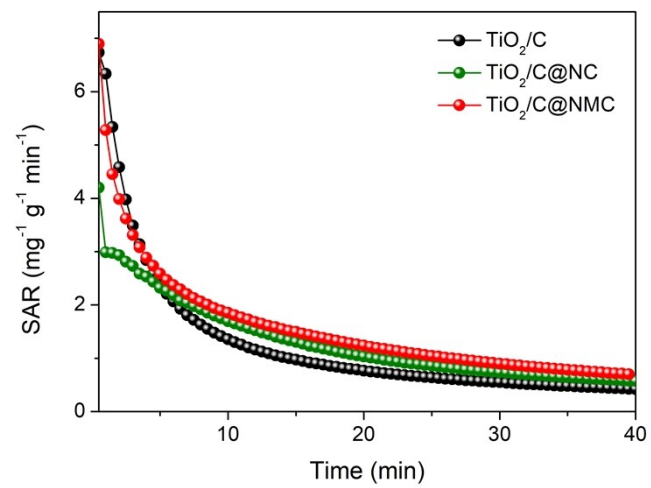

Fig. S15. The SAR variations versus time f TiO<sub>2</sub>/C, TiO<sub>2</sub>/C@NC, and TiO<sub>2</sub>/C@NMC.

Table S3. The charge efficiency ( $\mathcal{A}$ ) and energy consumption ( $E$ ) of  $\text{TiO}_2/\text{C}$ ,  $\text{TiO}_2/\text{C}@\text{NC}$ , and  $\text{TiO}_2/\text{C}@\text{NMC}$ .

| Sample                             | Charge efficiency (%) | Energy consumption<br>( $\text{kWh kg}_{\text{NaCl}}^{-1}$ ) |
|------------------------------------|-----------------------|--------------------------------------------------------------|
| $\text{TiO}_2/\text{C}$            | 73.1                  | 0.75                                                         |
| $\text{TiO}_2/\text{C}@\text{NC}$  | 79.4                  | 0.69                                                         |
| $\text{TiO}_2/\text{C}@\text{NMC}$ | 87.3                  | 0.61                                                         |

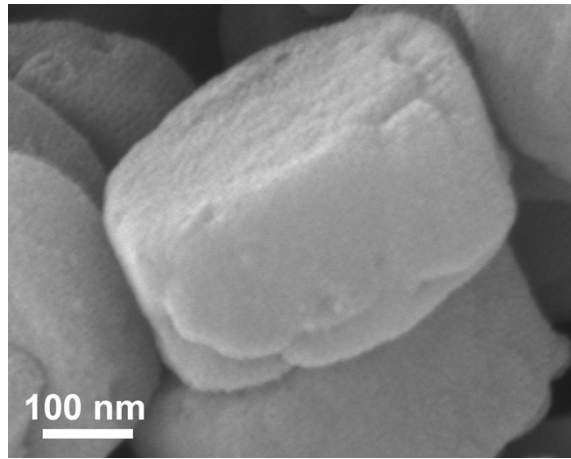

Fig. S16. SEM image of TiO<sub>2</sub>/C@NMC after regeneration tests.

Table S4. Comparison of TiO<sub>2</sub>/C@NMC and other reported electrode materials.

| Electrode materials                          | Voltage (V) | NaCl concentration (mg L <sup>-1</sup> ) | SAC (mg g <sup>-1</sup> ) | Ref.      |
|----------------------------------------------|-------------|------------------------------------------|---------------------------|-----------|
| rGO/T2                                       | 1.2         | 300                                      | 16.4                      | 1         |
| rGO-15TiO <sub>2</sub>                       | 1.2         | 75                                       | 24.58                     | 2         |
| TiO <sub>2</sub> @CNTs                       | 1.4         | 25-800                                   | 4.0                       | 3         |
| TiO <sub>2</sub> /carbon                     | 1.2         | 280                                      | 17.4                      | 4         |
| MoS <sub>2</sub> /graphene                   | 1.2         | 500                                      | 19.4                      | 5         |
| MnO <sub>x</sub> nanofiber                   | 1.2         | 877                                      | 27.8                      | 6         |
| Open and interconnected porous architectures | 1.2         | 500                                      | 14.35                     | 7         |
| Nitrogen-doped activated carbon              | 1.2         | 468                                      | 24.7                      | 8         |
| Sugarcane Biowaste-Derived Biochars          | 1.2         | 600                                      | 21.8                      | 9         |
| ZIF-8@PZS-C                                  | 1.2         | 500                                      | 22.19                     | 10        |
| TiO <sub>2</sub> @COF-2                      | 1.4         | 200                                      | 26.0                      | 11        |
| TiO <sub>2</sub> /C@NMC                      | 1.2         | 250                                      | 27.73                     | This work |
| TiO <sub>2</sub> /C@NMC                      | 1.6         | 250                                      | 35.54                     | This work |

## References

- 1 A. G. El-Deen, J.-H. Choi, C. S. Kim, K. A. Khalil, A. A. Almajid and N. A. M. Barakat, *Desalination*, 2015, **361**, 53-64.
- 2 H. M. Moustafa, M. Obaid, M. M. Nassar, M. A. Abdelkareem and M. S. Mahmoud, *Sep. Purif. Technol.*, 2020, **235**, 116178.
- 3 H. Li, Y. Ma and R. Niu, *Sep. Purif. Technol.*, 2016, **171**, 93-100.
- 4 P. Srimuk, M. Zeiger, N. Jäckel, A. Tolosa, B. Krüner, S. Fleischmann, I. Grobelsek, M. Aslan, B. Shvartsev, M. E. Suss, *Electrochim. Acta*, 2017, **224**, 314-328.
- 5 J. Han, T. Yan, J. Shen, L. Shi, J. Zhang, D. Zhang, *Environ. Sci. Technol.*, 2019, **53**, 12668-12676.
- 6 B. W. Byles, D. A. Cullen, K. L. More, E. Pomerantseva, *Nano Energy*, 2018, **44**, 476-488.
- 7 Y. Zhu, G. Zhang, C. Xu and L. Wang, *ACS Appl. Mater. Interfaces*, 2020, **12**, 29706-29716.
- 8 C. C. Hsu, Y. H. Tu, Y. H. Yang, J. A. Wang and C. C. Hu, *Desalination*, 2020, **481**, 114362.
- 9 J. J. Lado, R. L. Zornitta, I. V. Rodríguez, K. M. Barcelos and L. A. M. Ruotolo, *ACS Sustainable Chem. Eng.*, 2019, **7**, 18992-19004.
- 10 J. Zhang, J. Fang, J. Han, T. Yan, L. Shi and D. Zhang, *J. Mater. Chem. A*, 2018, **6**, 15245-15252.
- 11 X. Liu, S. Zhang, G. Feng, Z.-G. Wu, D. Wang, M. D. Albaqami, B. Zhong, Y. Chen, X. Guo, X. Xu, and Y. Yamauchi, *Chem. Mater.*, 2021, **33**, 1657-1666.
